# Supplementary material for: First-principles study on optoelectronic properties of Cs2PbX4–PtSe2 van der Waals heterostructures
Source: Royal Society of Chemistry journal article supplement (doi:10.1039/d1ra08574c), 2022-01-01
Supplement: d1ra08574c1.pdf [file d1ra08574c1.pdf]

## Support Information

### First-principles study on optoelectronic properties of Cs<sub>2</sub>PbX<sub>4</sub>-PtSe<sub>2</sub> van der Waals Heterostructures

Jingjing Li,<sup>a</sup> Dan Liang,<sup>a\*</sup> Gang Liu,<sup>a\*</sup> Baonan Jia,<sup>a</sup> Jingyu Cao,<sup>a</sup> Jinbo Hao,<sup>b</sup> Pengfei Lu<sup>a</sup>

*a.State Key Laboratory of Information Photonics and Optical Communications and School of Electronic Engineering, Beijing University of Posts and Telecommunications, Beijing 100876, China. Email: liangdan@bupt.edu.cn,*

*b.CAS Key Laboratory for Biomedical Effects of Nanomaterials and Nanosafety, Institute of High Energy Physics, Chinese Academy of Sciences, Beijing 100049, China. Email: wuly2018@gmail.com*

*c.School of Information Management, Beijing Information Science & Technology University, Beijing 100085, China.*

*d.School of Science, Xi'an University of Architecture and Technology, Xi'an 710055, Shaanxi, China.*

There are one table and three figures in Supplementary Material. Table S1 and Fig. S2 illustrate the band gap of monolayer Cs<sub>2</sub>PbX<sub>4</sub> and PtSe<sub>2</sub> with different calculation functional. The unit cells of 2D Cs<sub>2</sub>PbX<sub>4</sub>-PtSe<sub>2</sub> are shown in Fig. S1. We computed the band structures of orbital contribution for Cs<sub>2</sub>PbX<sub>4</sub>-PtSe<sub>2</sub> heterostructures, as shown in Fig. S3.

**Table S1** The bandgaps of monolayer Cs<sub>2</sub>PbX<sub>4</sub> and PtSe<sub>2</sub> by different calculation method.

|            | Cs <sub>2</sub> PbCl <sub>4</sub> | Cs <sub>2</sub> PbBr <sub>4</sub> | Cs <sub>2</sub> PbI <sub>4</sub> | PtSe <sub>2</sub> |
|------------|-----------------------------------|-----------------------------------|----------------------------------|-------------------|
| PBE        | 2.59                              | 2.18                              | 1.84                             | 1.38              |
| HSE        | 3.58                              | 2.91                              | 2.57                             | 1.96              |
| PBE+SOC    | 1.84                              | 1.46                              | 1.09                             | 1.21              |
| HSE+SOC    | 2.78                              | 2.14                              | 1.78                             | 1.79              |
| exprimment | 3.01                              | 2.32                              | 1.86                             | 1.20              |

\*Exprimental values are from Ref. [6,14,25,45]

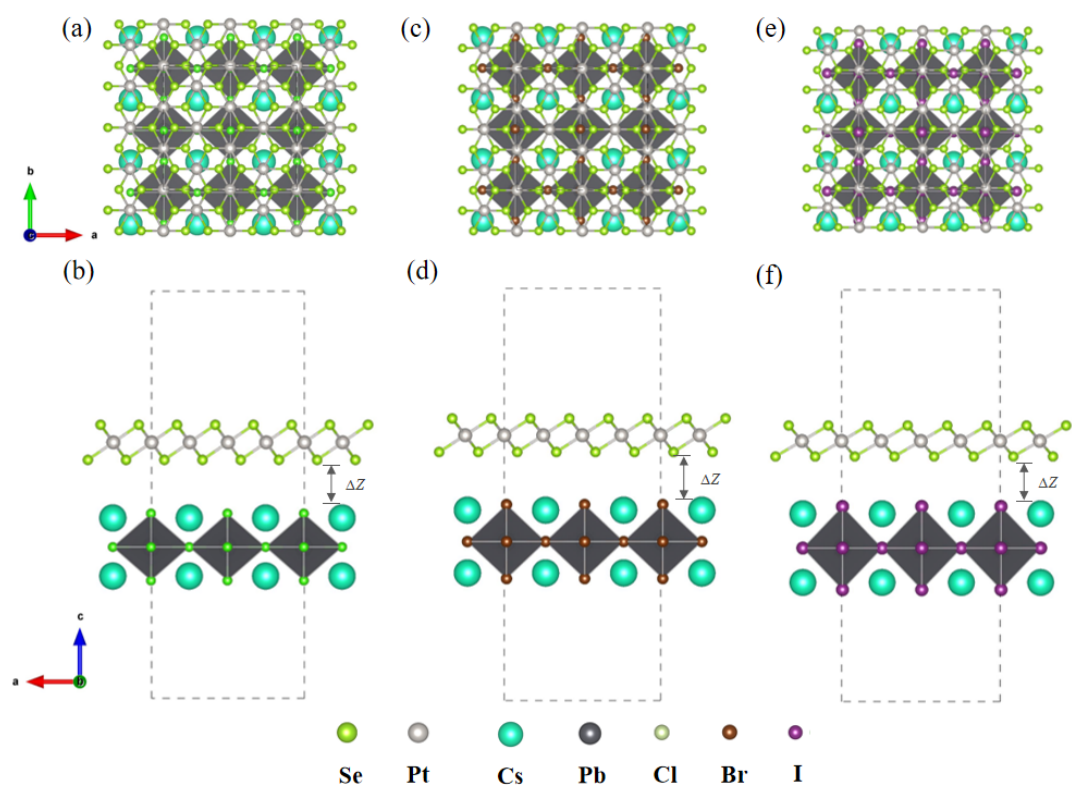

**Fig. S1** Top and side views of relaxed  $90^\circ$   $\text{Cs}_2\text{PbX}_4$ - $\text{PtSe}_2$  heterostructures. (a-b)  $\text{Cs}_2\text{PbCl}_4$ - $\text{PtSe}_2$  heterostructure. (c-d)  $\text{Cs}_2\text{PbBr}_4$ - $\text{PtSe}_2$  heterostructure. (e-f)  $\text{Cs}_2\text{PbI}_4$ - $\text{PtSe}_2$  heterostructure.

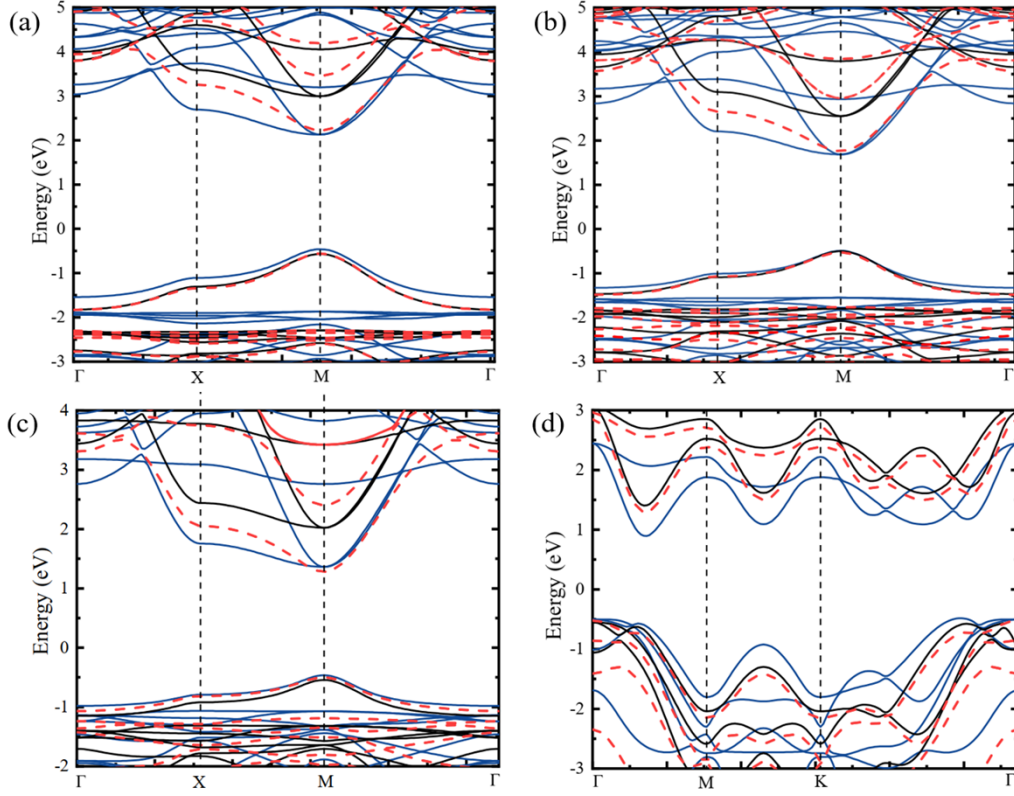

**Fig. S2** The bandgaps of monolayer (a) $\text{Cs}_2\text{PbCl}_4$ , (b) $\text{Cs}_2\text{PbBr}_4$ , (c) $\text{Cs}_2\text{PbI}_4$ , and (d)  $\text{PtSe}_2$  by PBE, HSE and HSE with SOC. The blue, black and red lines correspond to PBE, HSE and HSE with SOC, respectively

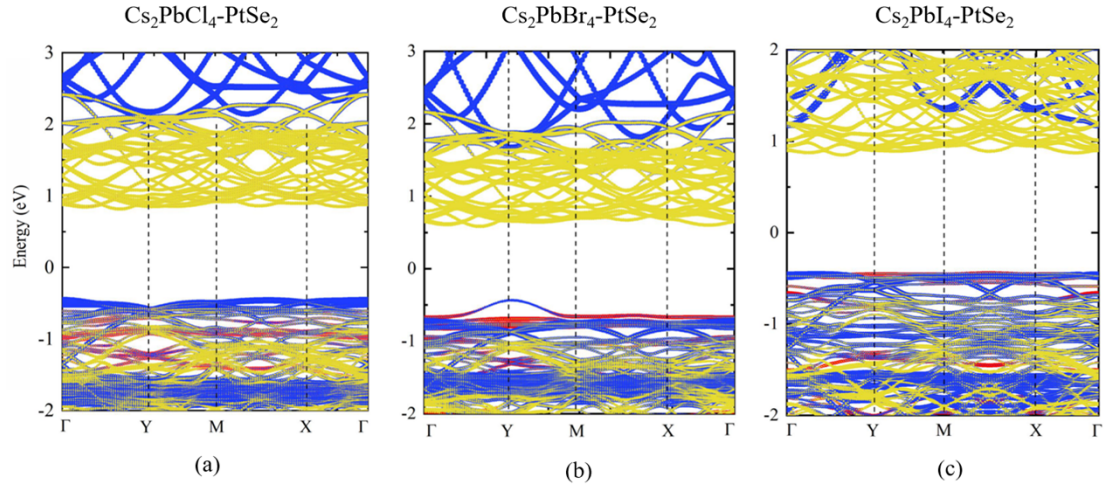

**Fig. S3** The band structures of orbital contribution for  $\text{Cs}_2\text{PbX}_4\text{-PtSe}_2$  heterostructures. The  $p_{x,y}$ -orbital,  $p_z$ -orbital and d-orbital contributions are indicated by blue, red and yellow dots, respectively.
